# Supplementary material for: Yeast-Hydrolysate-Derived 1-Methyl-1,2,3,4-tetrahydro-β-carboline-3-carboxylic Acid Inhibits Fat Accumulation during Adipocyte Differentiation
Source: MDPI journal article supplement (doi:10.3390/foods12183466), 2023-09-17
Supplement: s1 [file s1]

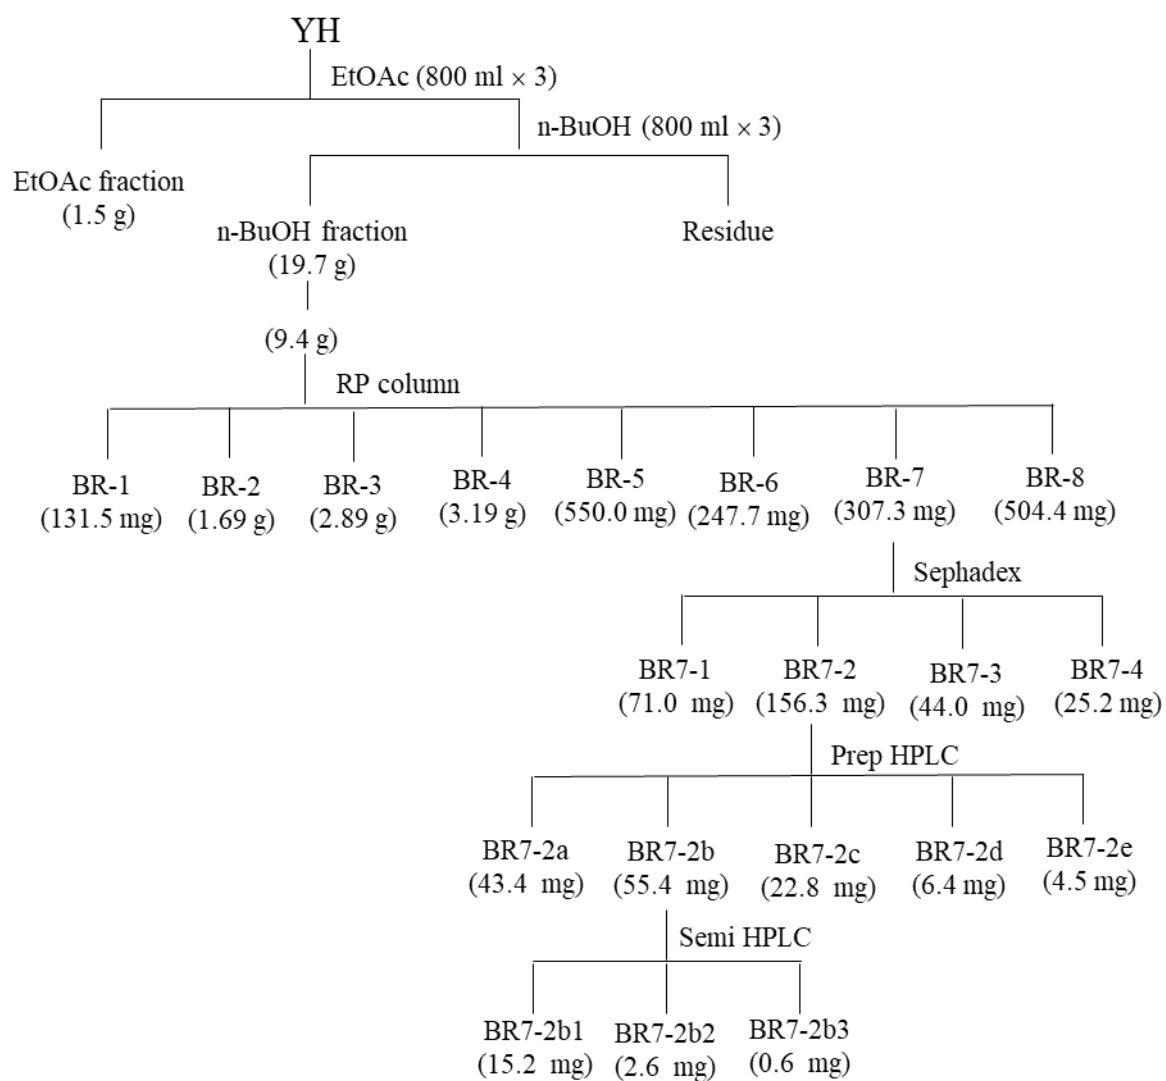

Figure S1. Isolation of anti-adipogenic compounds from yeast hydrolysate (YH).

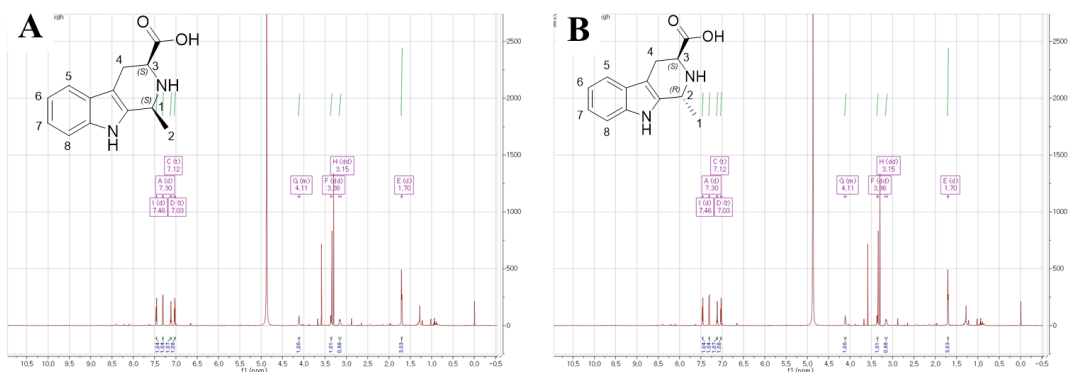

Figure S2. <sup>1</sup>H-NMR spectrum of BR7-2b1 (a) and BR7-2b2 (b).

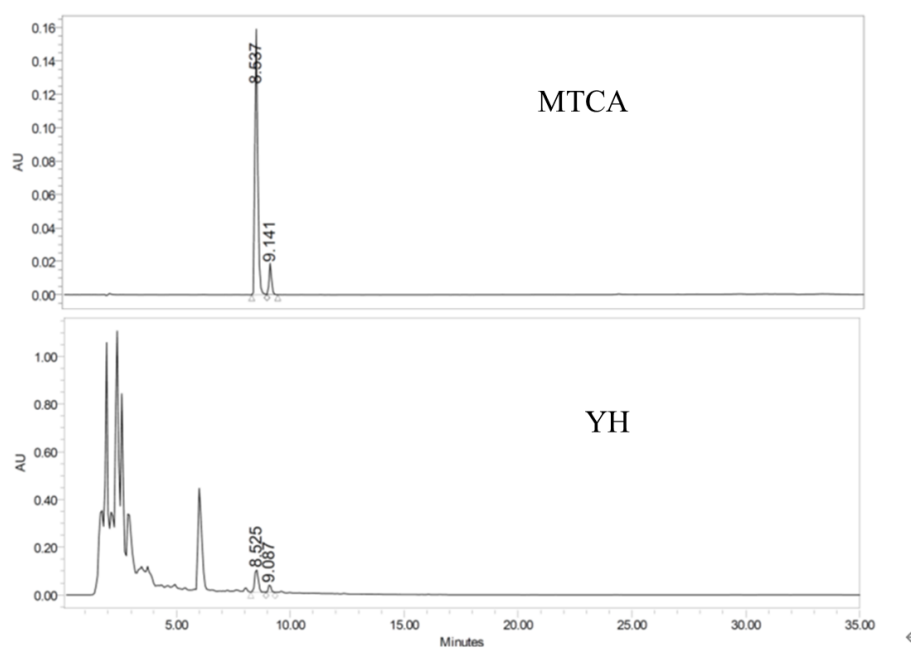

Figure S3. Chromatograms of 1-methyl-1,2,3,4-tetrahydro- $\beta$ -carboline-3-carboxylic acid (MTCA) standard (a) and YH (b).
